# Supplementary material
Source: PubMed Central journal article supplement (PMC8842852)
Supplement: NIHMS1769507-supplement-2.pdf [file NIHMS1769507-supplement-2.pdf]

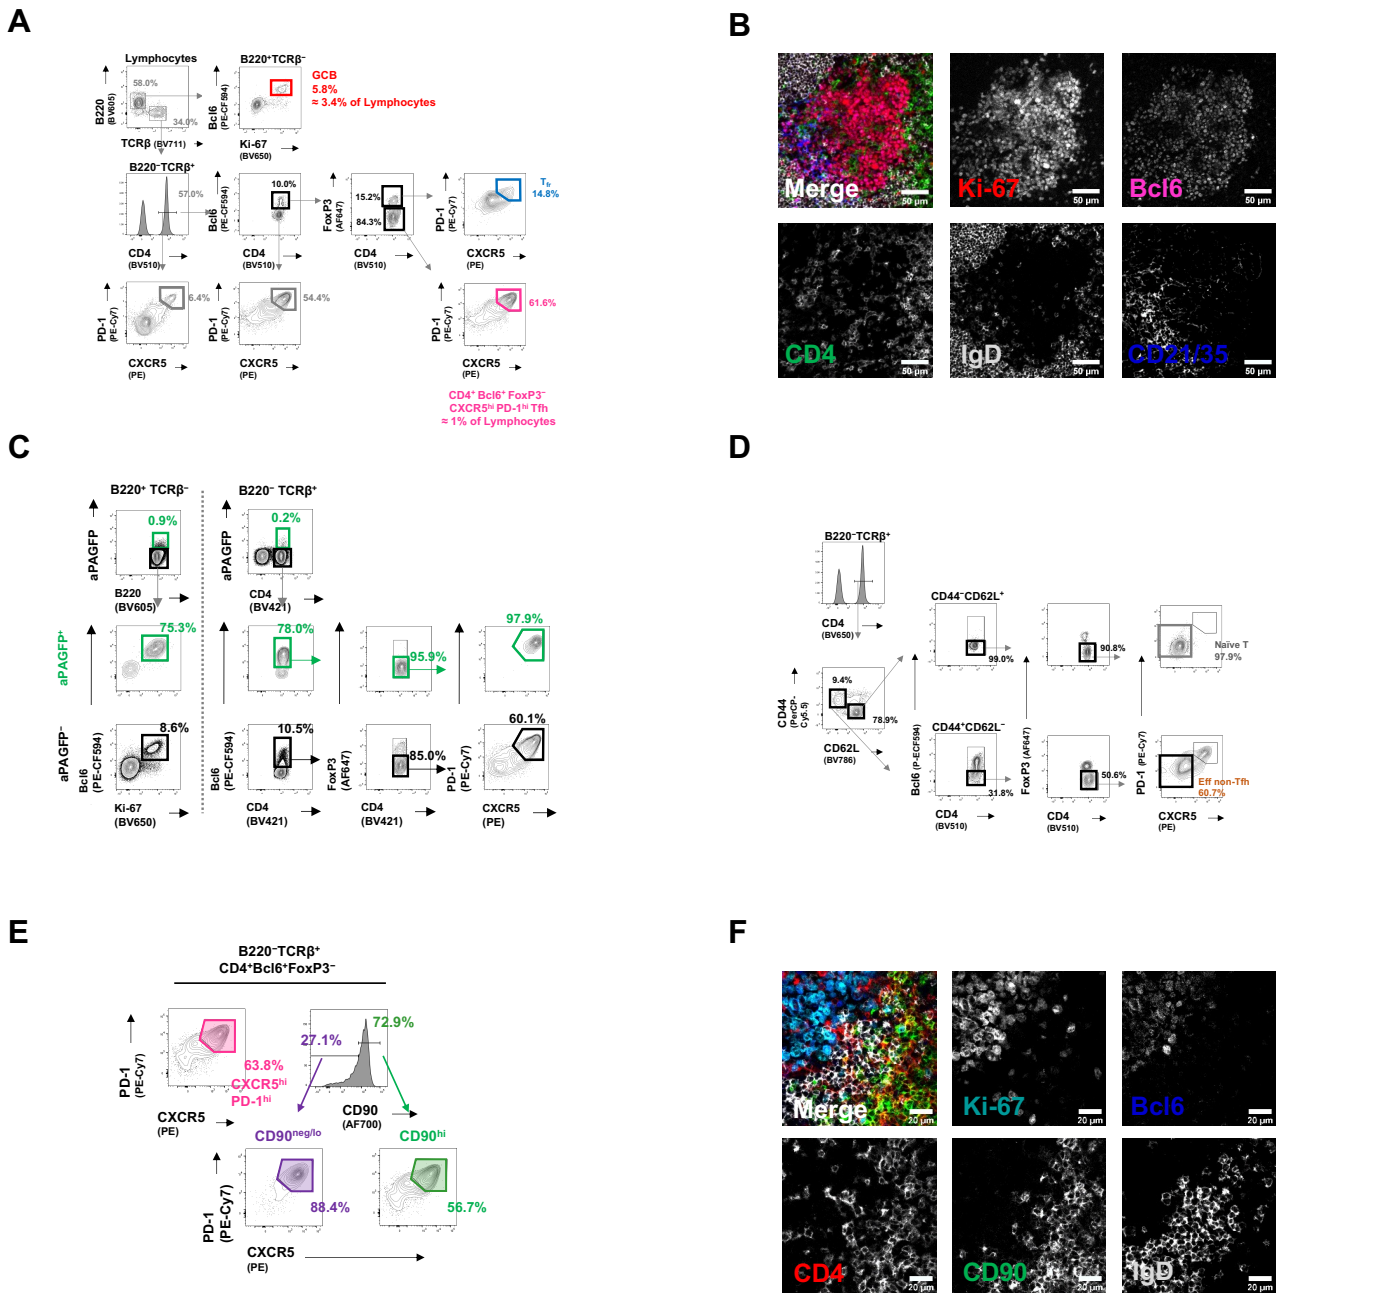

**Supplementary Figure 1. Gating strategies to identify GC B cells and GCTfh cells (related to Figure 1).** (A-B) B6 mice were immunized as described in Fig. 1A. (A) Lymphocytes harvested from the pLNs of immunized mice were pre-gated on single lymphocytes using the height, width and area of forward- and side-scatter signal. Dead cells were excluded using LIVE/DEAD™ reagents. GCB (red), GCTfh (magenta) and Tfh (light blue) cells were defined as B220<sup>+</sup>TCRβ<sup>-</sup>Bcl6<sup>+</sup>Ki-67<sup>+</sup>, B220<sup>+</sup>TCRβ<sup>+</sup>CD4<sup>+</sup>Bcl6<sup>+</sup>FoxP3<sup>+</sup>CXCR5<sup>hi</sup>PD-1<sup>hi</sup> and B220<sup>+</sup>TCRβ<sup>+</sup>CD4<sup>+</sup>Bcl6<sup>+</sup>FoxP3<sup>+</sup>CXCR5<sup>hi</sup>PD-1<sup>hi</sup> populations, respectively. The frequencies of GCB and Tfh cells among total harvested live/single lymphocytes are shown. (B) Split-channel images of Fig. 1C. The upper left panel represents merged signals from the other 5 panels. CD4 (green), CD21/CD35 (blue), IgD (gray), Ki-67 (red), Bcl6 (magenta). Magnification: x200, scale bars 50 μm. (C) PAGFP Tg mice were footpad-immunized and treated as described in Fig. 1E. Flow cytometry plots depicting the frequencies of GC B cells and Tfh populations among activated PAGFP (aPAGFP)<sup>+</sup> (green) and aPAGFP<sup>-</sup> (black) populations. (D-F) B6 mice were immunized as in Fig. 1A and analyzed at day 8 or 12 p.i. (D) Effector non-Tfh (eff non-Tfh; orange) cells were defined as B220<sup>+</sup>TCRβ<sup>+</sup>CD4<sup>+</sup>CD44<sup>+</sup>CD62L<sup>-</sup>Bcl6<sup>-</sup>FoxP3<sup>+</sup>CXCR5<sup>low</sup>PD-1<sup>low</sup>. (E) CD90<sup>neg/lo</sup> GCTfh (purple) and CD90<sup>hi</sup> GCTfh-like (green) cells were defined as B220<sup>+</sup>TCRβ<sup>+</sup>CD4<sup>+</sup>Bcl6<sup>+</sup>FoxP3<sup>-</sup>CXCR5<sup>hi</sup>PD-1<sup>hi</sup>CD90<sup>neg/lo</sup> and B220<sup>+</sup>TCRβ<sup>+</sup>CD4<sup>+</sup>Bcl6<sup>+</sup>FoxP3<sup>-</sup>CXCR5<sup>hi</sup>PD-1<sup>hi</sup>CD90<sup>hi</sup> populations, respectively. The frequencies of CXCR5<sup>hi</sup>PD-1<sup>hi</sup> cells in CD90<sup>neg/lo</sup> and CD90<sup>hi</sup> Bcl6<sup>+</sup>FoxP3<sup>-</sup> T cells are shown. (F) Split channel images of Fig. 1H. The upper left panel represents merged signals from the other 5 panels. CD4 (red), CD90 (green), IgD (gray), Bcl6 (blue), Ki-67 (cyan). Magnification: x630, scale bars 20 μm.

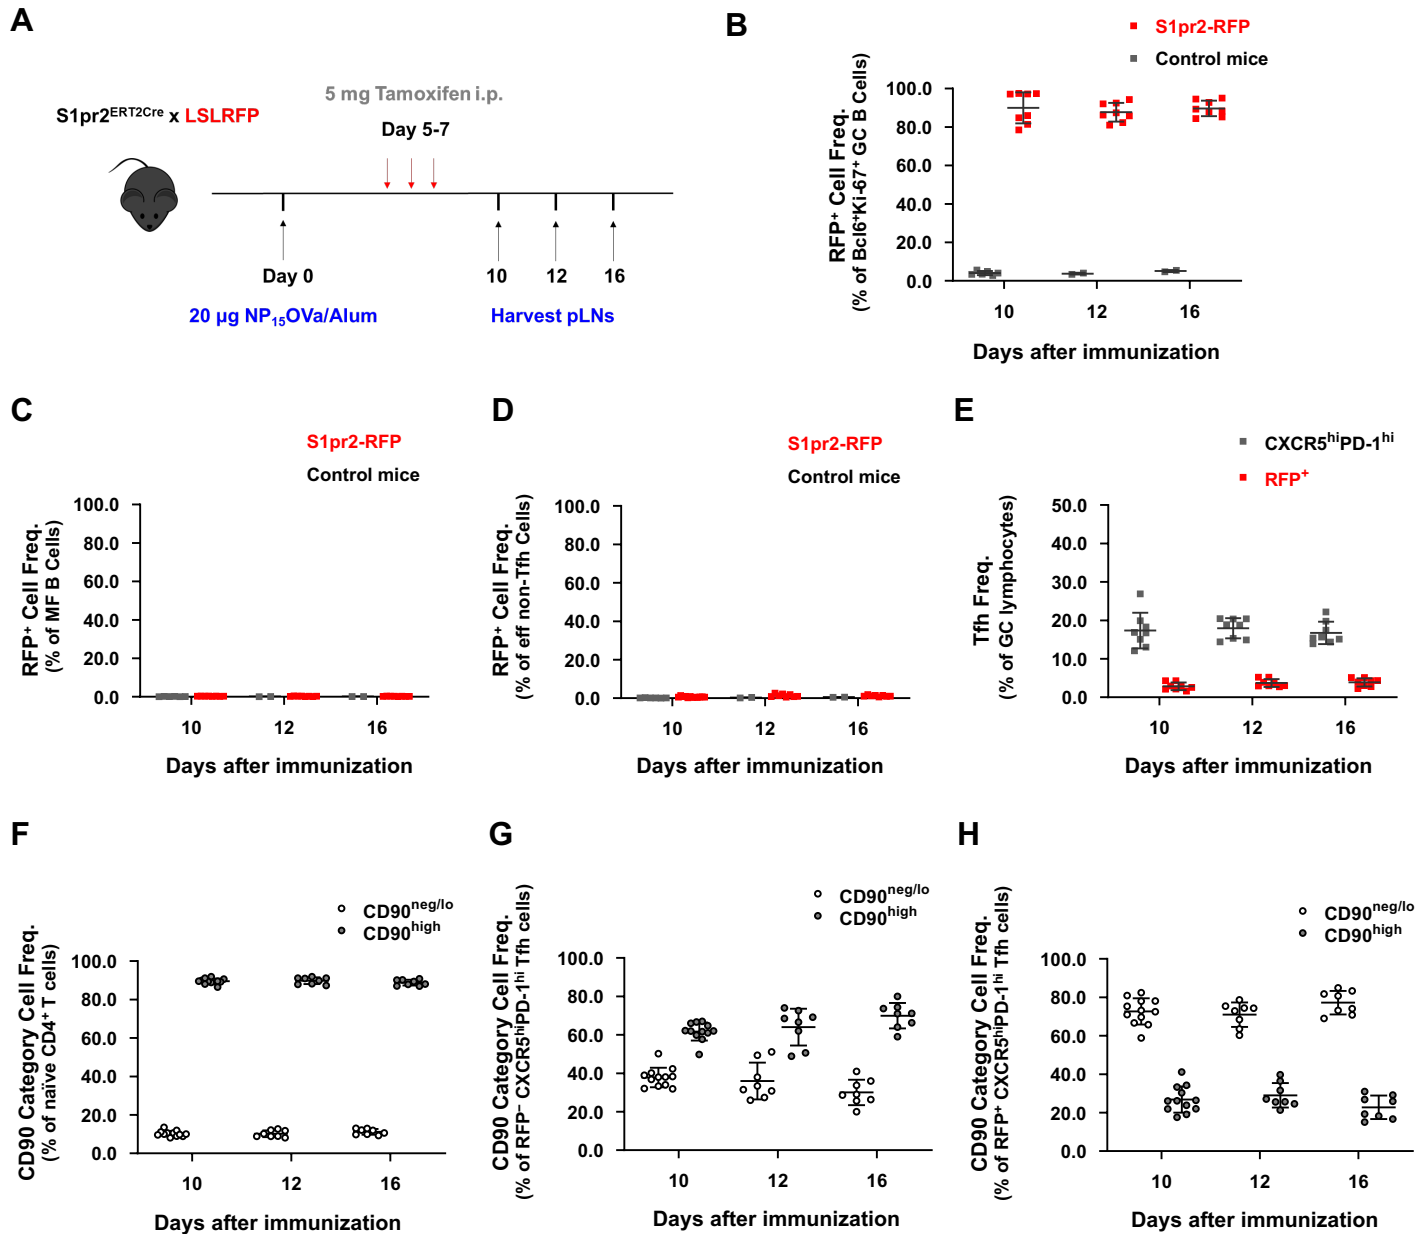

**Supplementary Figure 2. Surface CD90 expression is specifically down-regulated on S1pr2-driven RFP-labeled GC-resident Tfh cells (related to Figure 2).** S1pr2-RFP mice were footpad-immunized with 20 µg of NP-Ova in alum and treated with 5 mg tamoxifen (*i.p.*) daily at days 5-7 p.i. Draining pLNs were harvested at days 10, 12 and 16 p.i. **(A)** Diagram of the experimental design. **(B-D)** Frequencies of RFP<sup>+</sup> cells among **(B)** GCB, **(C)** Mature follicular B cells and **(D)** eff non-Tfh cells ( $n = 8$ ; mean  $\pm$  S.D.). **(E)** Frequencies of RFP-marked (red) or all CXCR5<sup>hi</sup>PD-1<sup>hi</sup> Tfh cells (black) in the GCs of individual pLNs ( $n = 8$ ; mean  $\pm$  S.D.). **(F-H)** Frequencies of CD90<sup>hi</sup> or CD90<sup>neg/lo</sup> cells among **(F)** naive CD4<sup>+</sup> T cells, **(G)** RFP<sup>-</sup> and **(H)** RFP<sup>+</sup> CXCR5<sup>hi</sup>PD-1<sup>hi</sup> Tfh cells at indicated time points. Each symbol represents an individual mouse. Data were pooled from  $\geq 2$  independent experiments.

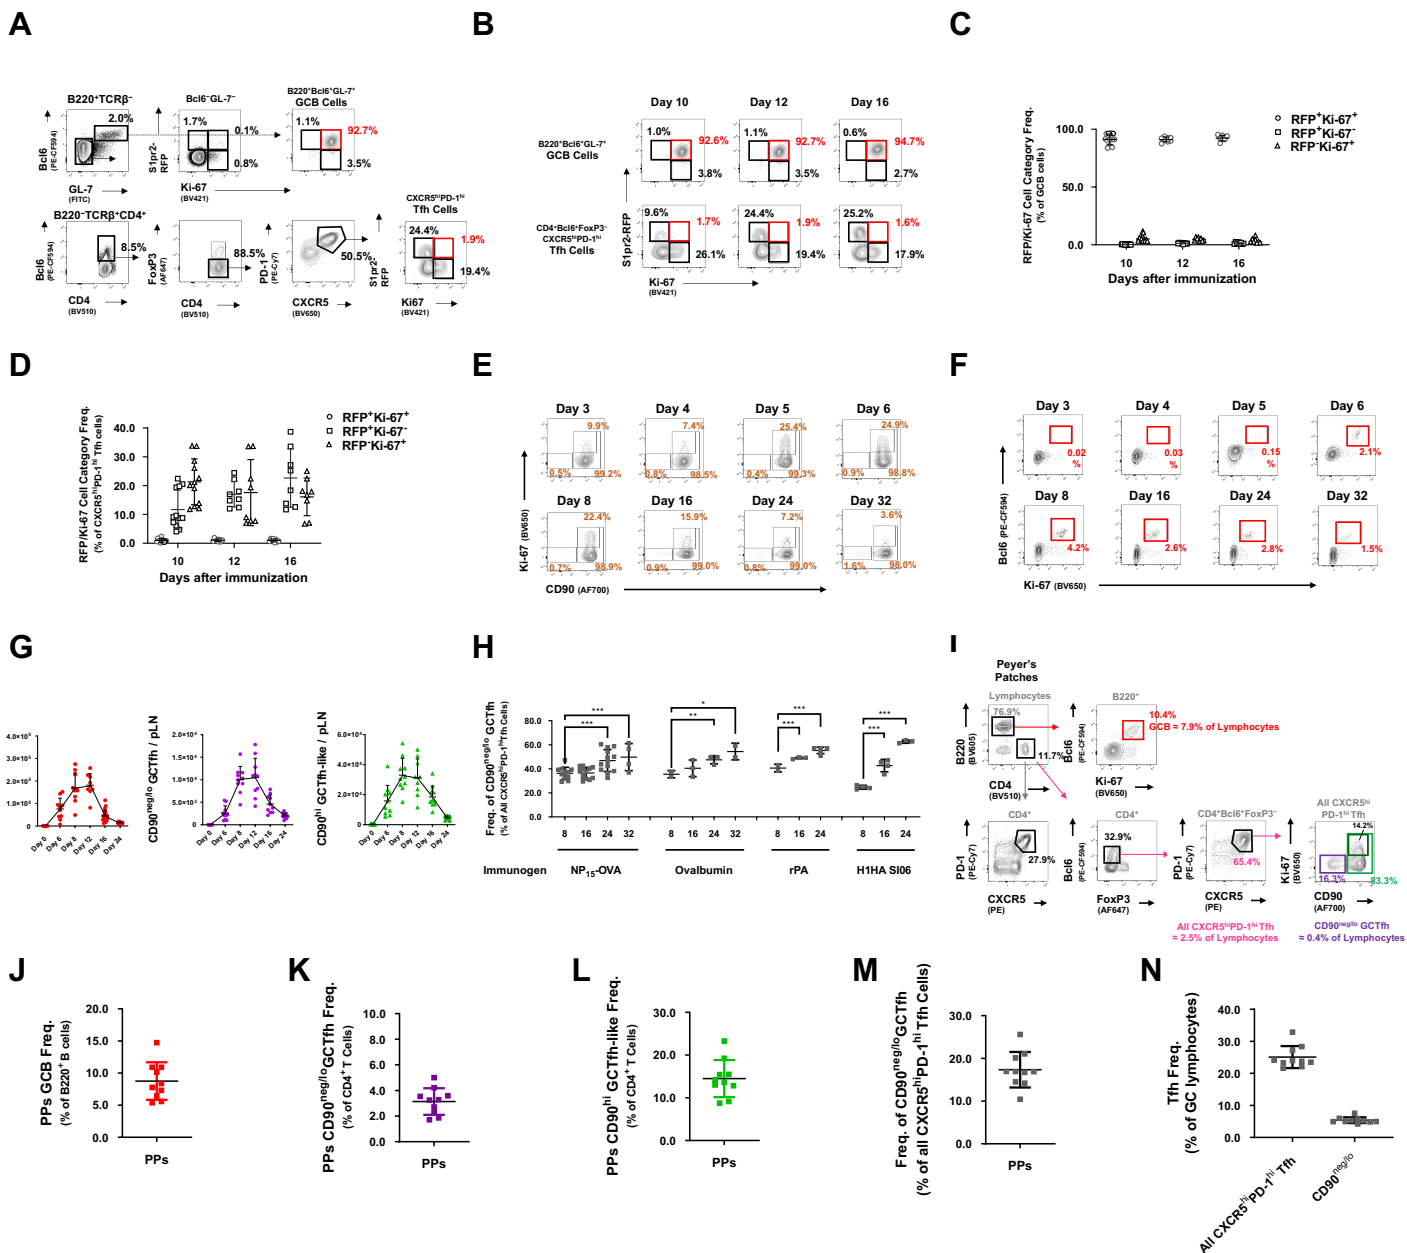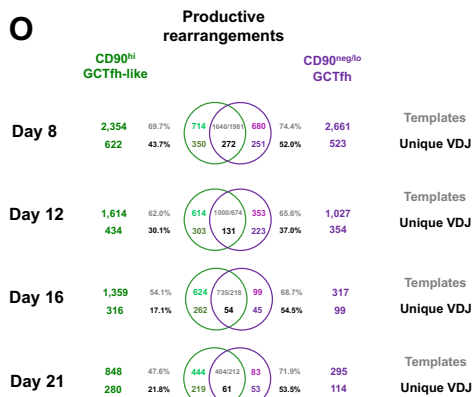

**Supplementary Figure 3. GC-resident Tfh cells cease proliferating after GC organization (related to Figure 3).** S1pr2-RFP mice were immunized and treated as described in Fig. S2A. (A) GCB and Tfh cells were defined as B220<sup>+</sup>TCRβ<sup>-</sup>Bcl6<sup>+</sup>GL-7<sup>+</sup> and B220<sup>+</sup>TCRβ<sup>-</sup>CD4<sup>+</sup>Bcl6<sup>+</sup>FoxP3<sup>+</sup>CXCR5<sup>hi</sup>PD-1<sup>hi</sup> populations, respectively. The frequencies of RFP<sup>+</sup> and Ki-67<sup>+</sup> GCB and CXCR5<sup>hi</sup>PD-1<sup>hi</sup> Tfh cells are shown. (B) Representative flow contour plots showing the frequencies of RFP<sup>+</sup>Ki-67<sup>+</sup> (circle), RFP<sup>+</sup>Ki-67<sup>-</sup> (square), and RFP<sup>-</sup>Ki-67<sup>+</sup> (triangle) cells among (C) GCB and (D) CXCR5<sup>hi</sup>PD-1<sup>hi</sup> Tfh cells at indicated time points (n = 8 at each time point; mean ± S.D.). (E-G) C57BL/6 mice were immunized and tissues were harvested as described in Fig. 1A. (E) Representative flow contour plots showing the frequencies of CD90<sup>neg/lo</sup>Ki-67<sup>+</sup>, CD90<sup>hi</sup>Ki-67<sup>+</sup> (proliferating eff non-Tfh) and CD90<sup>hi</sup> populations among the eff non-Tfh population in pLNs harvested at indicated time points. Eff non-Tfh were gated as in Fig. S1D. (F) Representative flow contour plots showing the frequencies of Bcl6<sup>+</sup>Ki-67<sup>+</sup> GCB cells among B220<sup>+</sup>TCRβ<sup>-</sup> total B cells at indicated time points. (G) The population kinetics (numbers) of GCB cells (red circle), CD90<sup>hi</sup> GCTfh-like cells (green triangle) and CD90<sup>neg/lo</sup> GCTfh cells (purple hexagon) after immunization (n = 10 at each time point; mean ± S.D.). (H) B6 mice were immunized with 20 μg of either NP<sub>15</sub>-Ova, Ova, rPA or rHA in alum, and pLN cells were analyzed at indicated time points. Shown are frequencies of CD90<sup>neg/lo</sup> GCTfh cells among all CXCR5<sup>hi</sup>PD-1<sup>hi</sup> Tfh populations in immunized pLNs (n > 3 at each time point; mean ± S.D.). (I-N) PPs from the small intestine of C57BL/6 mice were harvested, stained and subjected to flow cytometric analysis. (I) Representative flow plots show the frequency of GCB (red) among total lymphocytes and the frequencies of CD90<sup>neg/lo</sup>Ki-67<sup>+</sup> (CD90<sup>neg/lo</sup> GCTfh; purple), CD90<sup>hi</sup>Ki-67<sup>+</sup> (proliferating GCTfh-like; black) and CD90<sup>hi</sup> GCTfh-like (light green) populations among all CD4<sup>+</sup>Bcl6<sup>+</sup>FoxP3<sup>+</sup>CXCR5<sup>hi</sup>PD-1<sup>hi</sup> Tfh cells in PPs. (J-L) Frequencies of PP (J) GCB cells, (K) CD90<sup>neg/lo</sup> GCTfh cells and (L) CD90<sup>hi</sup> GCTfh-like cells. (M) Frequencies of PP CD90<sup>neg/lo</sup> GCTfh cells among all CXCR5<sup>hi</sup>PD-1<sup>hi</sup> Tfh cells. (N) Frequencies of all CXCR5<sup>hi</sup>PD-1<sup>hi</sup> Tfh and CD90<sup>neg/lo</sup> GCTfh in GC lymphocytes (GCB + indicated Tfh) of harvested PPs (n = 10; mean ± S.D.). (O) FoxP3<sup>EGFP</sup> mice were footpad-immunized with 20 μg of NP-Ova in alum. CD90<sup>neg/lo</sup> GCTfh (purple) and CD90<sup>hi</sup> GCTfh-like cells (green) were sorted from the same pLN at indicated time points and were subjected to high-throughput TCRβ sequencing. Venn diagrams show the numbers and frequencies of unique and shared templates (Gray; upper row) or VDJ rearrangements (Black; lower row) between CD90<sup>neg/lo</sup> GCTfh and CD90<sup>hi</sup> GCTfh-like subsets. Gating strategies are shown in Fig. S7A. Data represent one of two independent experiments. (C-D, G-H, J-N) Each symbol represents an individual mouse. Data were pooled from at least two independent experiments. Statistical significance was measured using ordinary ANOVA followed by Dunnett's multiple comparison post-tests against the day 8 group in each immunization (\*P<0.05; \*\*P<0.01; \*\*\*P<0.001).

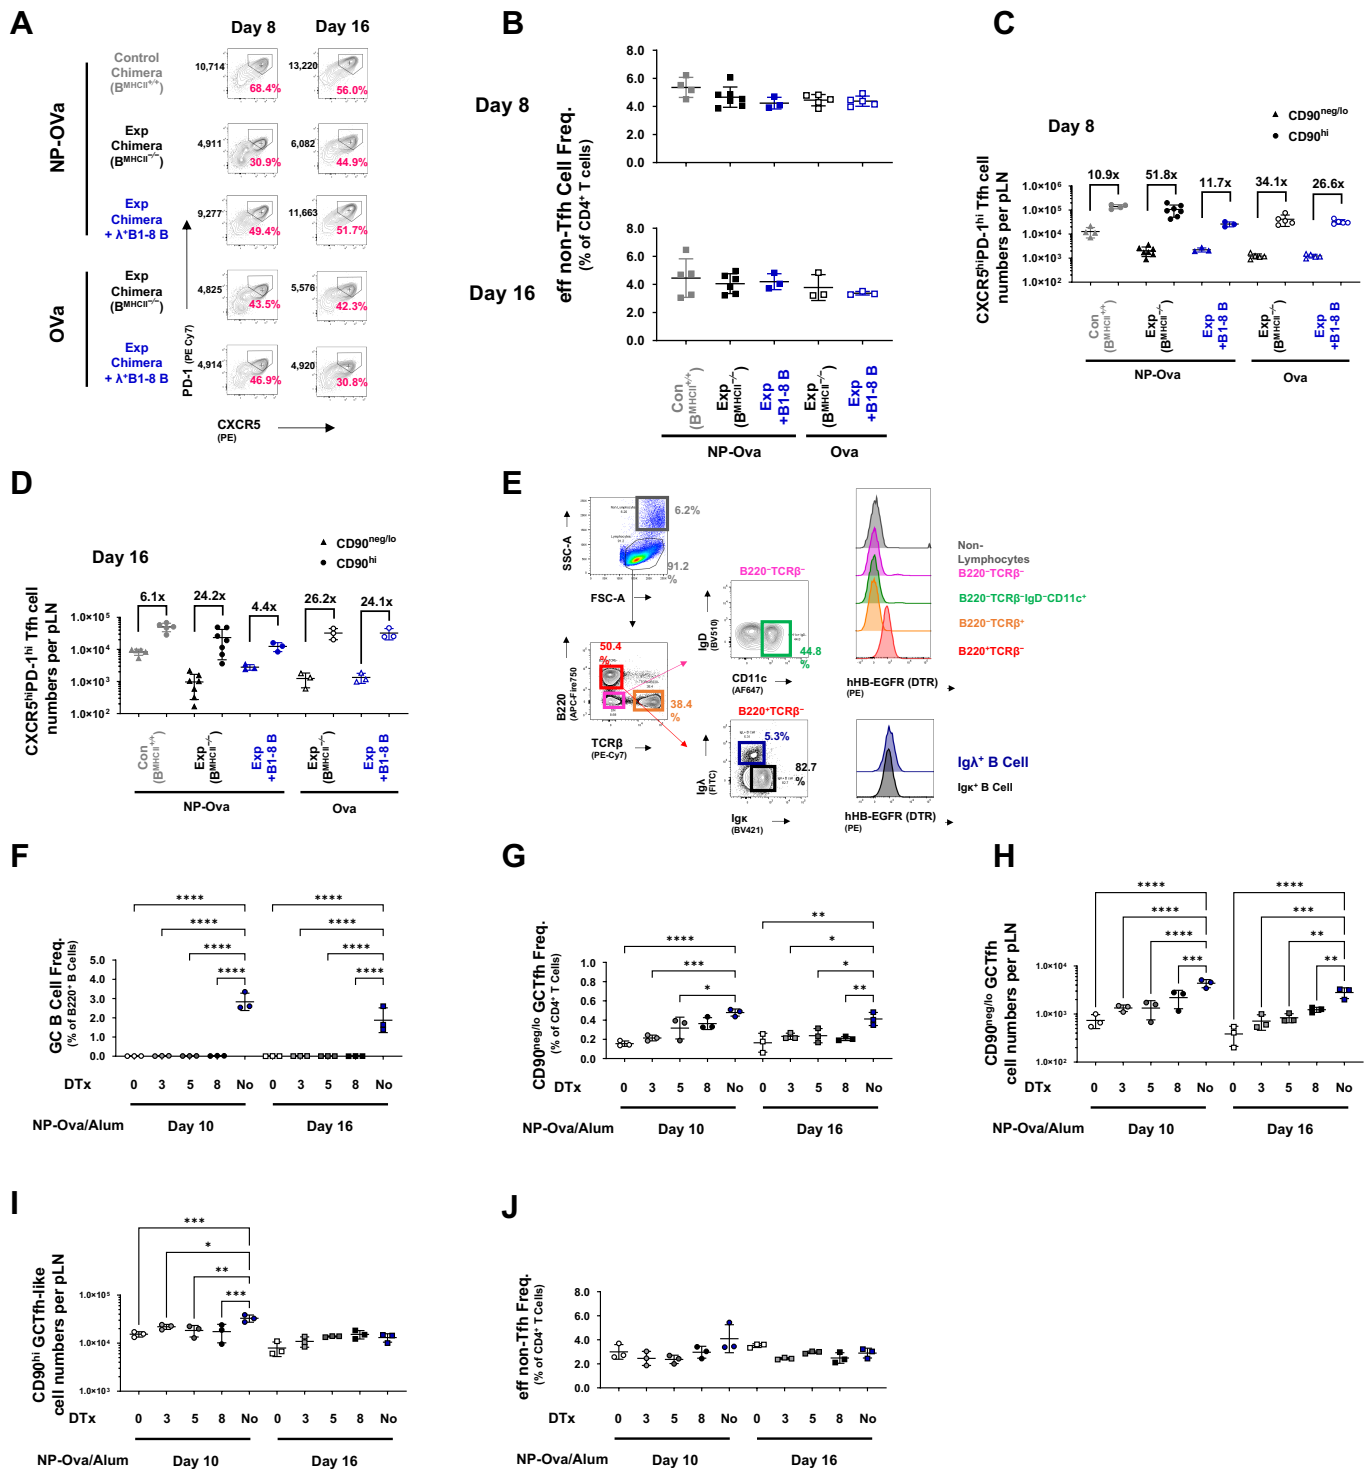

**Supplementary Figure 4. CD90<sup>neg/lo</sup> GCTfh differentiation requires B cells to present cognate pMHCII until GCs completely coalesce (related to Fig. 4 and 5).** (A-D) Chimeric mice were generated and treated as described in Fig. 4A. (A) Representative flow contour plots depicting the frequencies of CXCR5<sup>hi</sup>PD-1<sup>hi</sup> cells (magenta) among CD4<sup>+</sup>Bcl6<sup>+</sup>FoxP3<sup>-</sup> Tfh cells in pLNs at days 8 and 16 p.i. The cross marks the MFI signal within the CXCR5<sup>hi</sup>PD-1<sup>hi</sup> gate. Black numbers to the left of each panel denote the PD-1 (PECy7) MFI within the gated population. (B) Frequencies of eff non-Tfh cells among CD4<sup>+</sup> cells at indicated time points. (C-D) absolute numbers of CD90<sup>neg/lo</sup> GCTfh (triangle) and CD90<sup>hi</sup> GCTfh-like (circle) cells per pLN at (C) day 8 and (D) day 16 p.i. (A-D; n = 3-8 at each time point; mean  $\pm$  S.D.). (E) Human HB-EGP receptor (diphtheria toxin [DTx] receptor) expression on blood leukocytes from Mb1<sup>Cre</sup> x DTR<sup>LSL</sup> mice. The DT receptor was expressed on all B220<sup>+</sup> B cells. (F-J) Chimeric mice were generated and treated as in Fig. 5A. Shown are (F) frequencies of GCB cells, (G) frequencies of CD90<sup>neg/lo</sup> GCTfh, (H) absolute numbers of CD90<sup>neg/lo</sup> GCTfh, (I) absolute numbers of CD90<sup>hi</sup> GCTfh-like and (J) frequencies of eff non-Tfh in CD4<sup>+</sup> cells at indicated time points (F-J; n = 3 at each time point; mean  $\pm$  S.D.). Each symbol represents an individual mouse. Data were pooled from at least two independent experiments. Statistical significance was measured using ordinary ANOVA followed by Tukey's multiple comparison post-tests (\*\*\*P<0.01; \*\*\*\*P<0.001).

**A**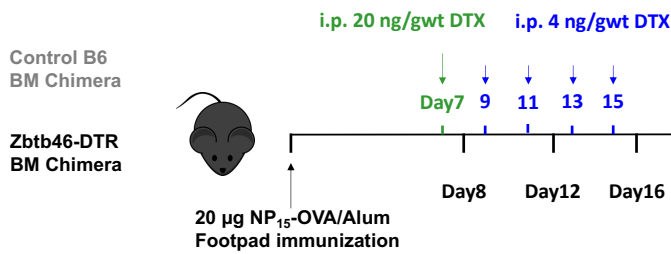**B**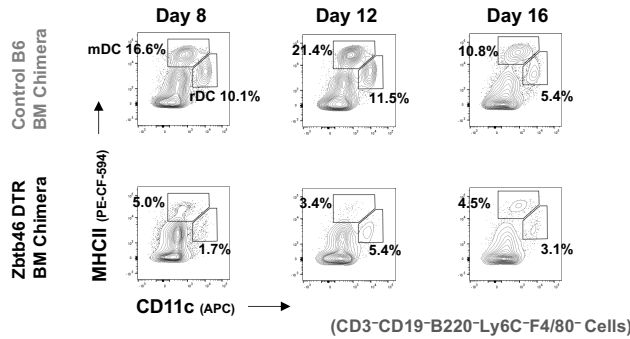**C**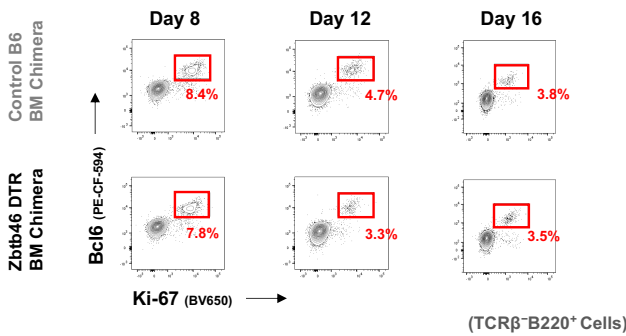**D**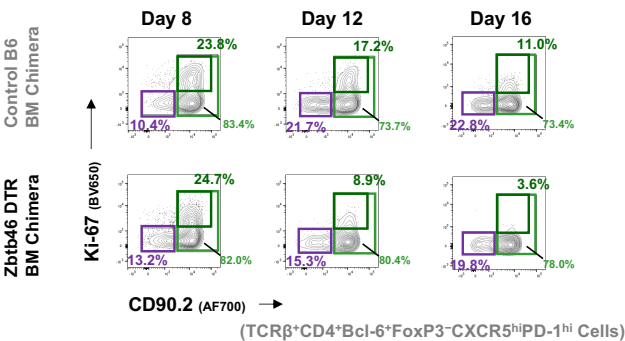**E**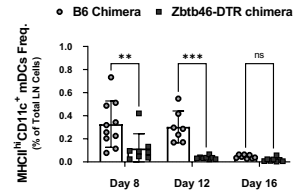**F**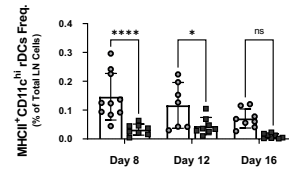**G**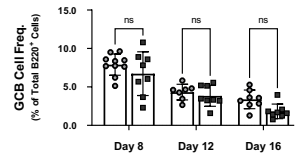**H**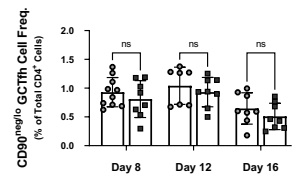**I**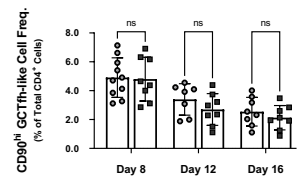**J**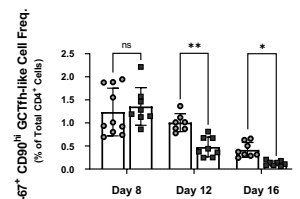

**Supplementary Figure 5. Depletion of cDCs during GC responses halt proliferation in CD90<sup>hi</sup> Tfh-like cells (related to Figure 4 and 5).** (A) Diagram of the experimental design. (B) Representative flow contour plots showing the frequencies of MHCII<sup>hi</sup>CD11c<sup>+</sup> mDCs and MHCII<sup>hi</sup>CD11c<sup>hi</sup> rDCs among CD3-CD19-B220-Ly6C-F4/80<sup>-</sup> cells in pLNs at indicated time points. (C) Representative flow contour plots showing the frequencies of Bcl6<sup>+</sup>Ki-67<sup>+</sup> GCB cells (red) among B220<sup>+</sup>TCR $\beta$ <sup>-</sup> total B cells in pLNs at indicated time points. (D) Representative flow cytometry contour plots depicting the frequencies CD90<sup>neg/lo</sup> Ki-67<sup>-</sup> (CD90<sup>neg/lo</sup> GCTfh; purple), CD90<sup>hi</sup> GCTfh-like (light green) or Ki-67<sup>+</sup>CD90<sup>hi</sup> GCTfh-like (dark green) cells among all CXCR5<sup>hi</sup>PD-1<sup>hi</sup> Tfh cells in pLNs at indicated time points. (E-J) Frequencies of (E) MHCII<sup>hi</sup>CD11c<sup>+</sup> mDCs among all pLN cells, (F) MHCII<sup>hi</sup>CD11c<sup>hi</sup> rDCs among all pLN cells, (G) GCB cells among total B220<sup>+</sup> B cells, (H) CD90<sup>neg/lo</sup> GCTfh cells, (I) CD90<sup>hi</sup> GCTfh-like cells and (J) Ki-67<sup>+</sup>CD90<sup>hi</sup> GCTfh-like cells among all CXCR5<sup>hi</sup>PD-1<sup>hi</sup> Tfh cells at indicated time points (n = 7-10 at each time point; mean  $\pm$  S.D.). Each symbol represents an individual chimera mouse from at least two independent experiments. Statistical significance was measured using two-way ANOVA followed by Sidak's multiple comparison post-tests (\*P<0.05; \*\*P<0.01; \*\*\* P<0.001, \*\*\*\*P<0.0001).

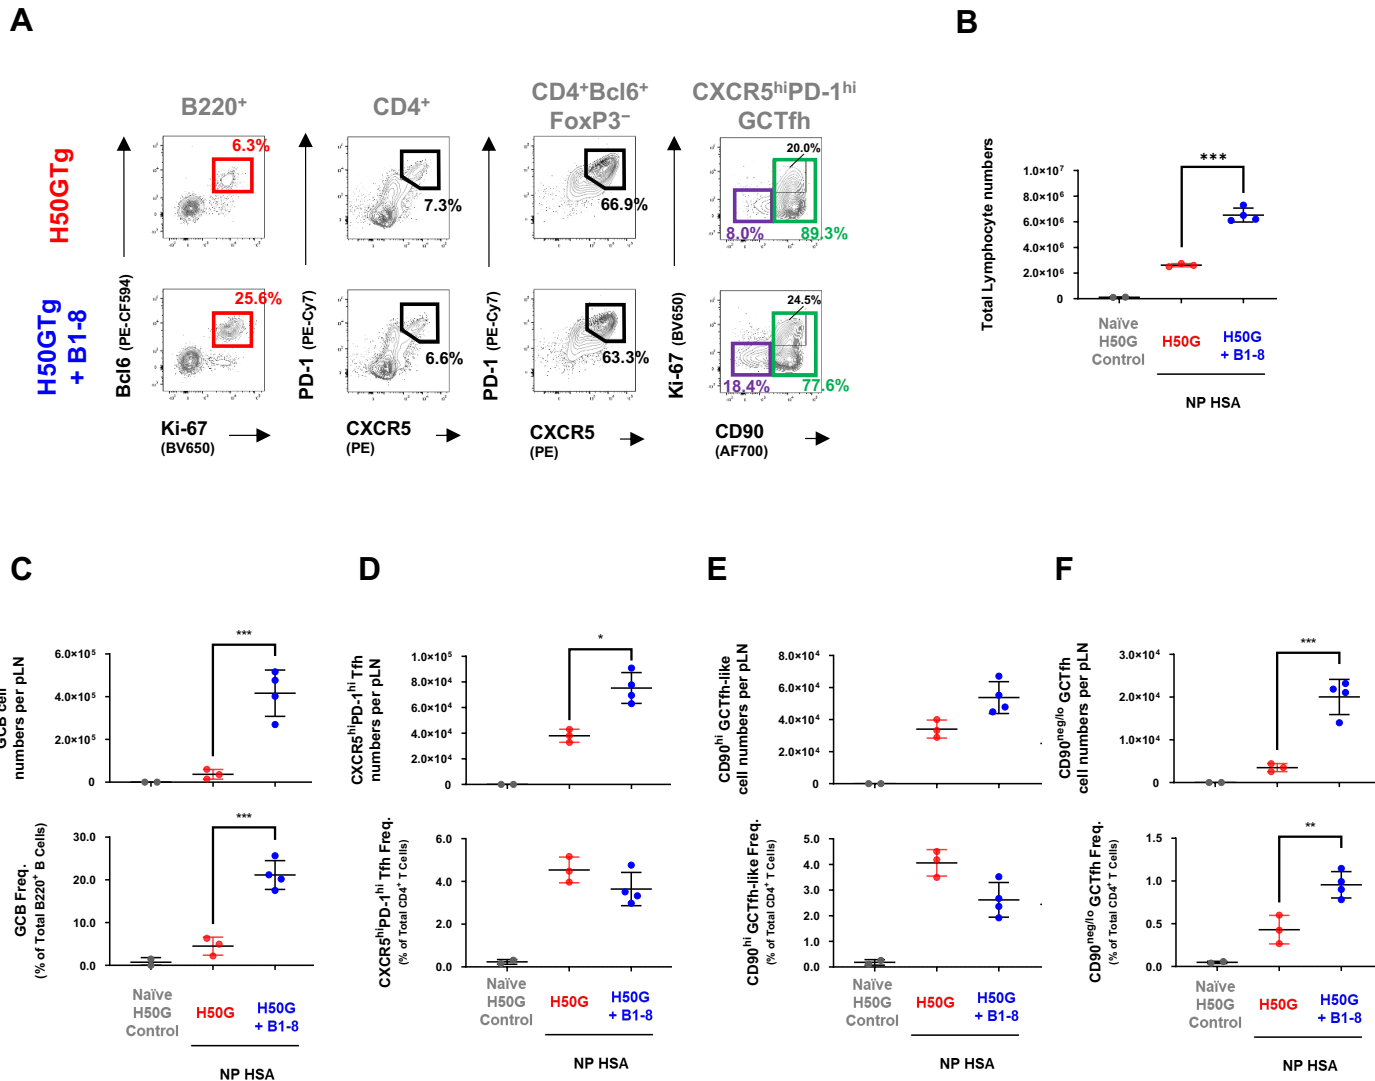

**Supplementary Figure 6. Transfer of B1-8 B cells to B6.H50G $\mu$  transgenic mice increases GCB- as well as GC-resident CD90<sup>neg/lo</sup> GCTfh-responses after NP-immunization (related to Figure 6).** Recipient B6.H50G $\mu$  transgenic mice injected with PBS (control) or  $1 \times 10^5$  NP+ B1-8i mature follicular B cells (experiment) were immunized with 20  $\mu$ g of NP-HSA in alum via footpad. pLN lymphocytes were harvested, stained and examined by flow cytometry 8 days p.i. **(A)** Representative flow contour plots showing the frequencies of B220<sup>+</sup>Bcl6<sup>+</sup>Ki-67<sup>+</sup> GC B cells (red; far left panel), all CD4<sup>+</sup>CXCR5<sup>hi</sup>PD-1<sup>hi</sup> Tfh cells (left panel), CD4<sup>+</sup>Bcl6<sup>+</sup>FoxP3<sup>-</sup>CXCR5<sup>hi</sup>PD-1<sup>hi</sup> GCTfh cells (right panel) and the frequencies of CD90<sup>neg/lo</sup>Ki-67<sup>-</sup> (CD90<sup>neg/lo</sup> GCTfh; purple), CD90<sup>hi</sup>Ki-67<sup>+</sup> (proliferating GCTfh-like; black) and CD90<sup>hi</sup> GCTfh-like (green) populations in pLNs harvested from control and experiment mice at day 8 p.i. **(B-F)** Absolute numbers and frequencies of **(B)** lymphocytes, **(C)** GCB cells, **(D)** all CXCR5<sup>hi</sup>PD-1<sup>hi</sup> Tfh cells, **(E)** CD90<sup>hi</sup>GCTfh-like cells and **(F)** CD90<sup>neg/lo</sup> GCTfh cells at day 8 p.i. (n = 3-4; mean  $\pm$ S.D.). Each symbol represents an individual mouse. Results pooled from at least two independent experiments. Statistical significance was measured using ordinary ANOVA followed by Tukey's multiple comparison post-tests (\*P<0.05; \*\*P<0.01; \*\*\*P<0.001).



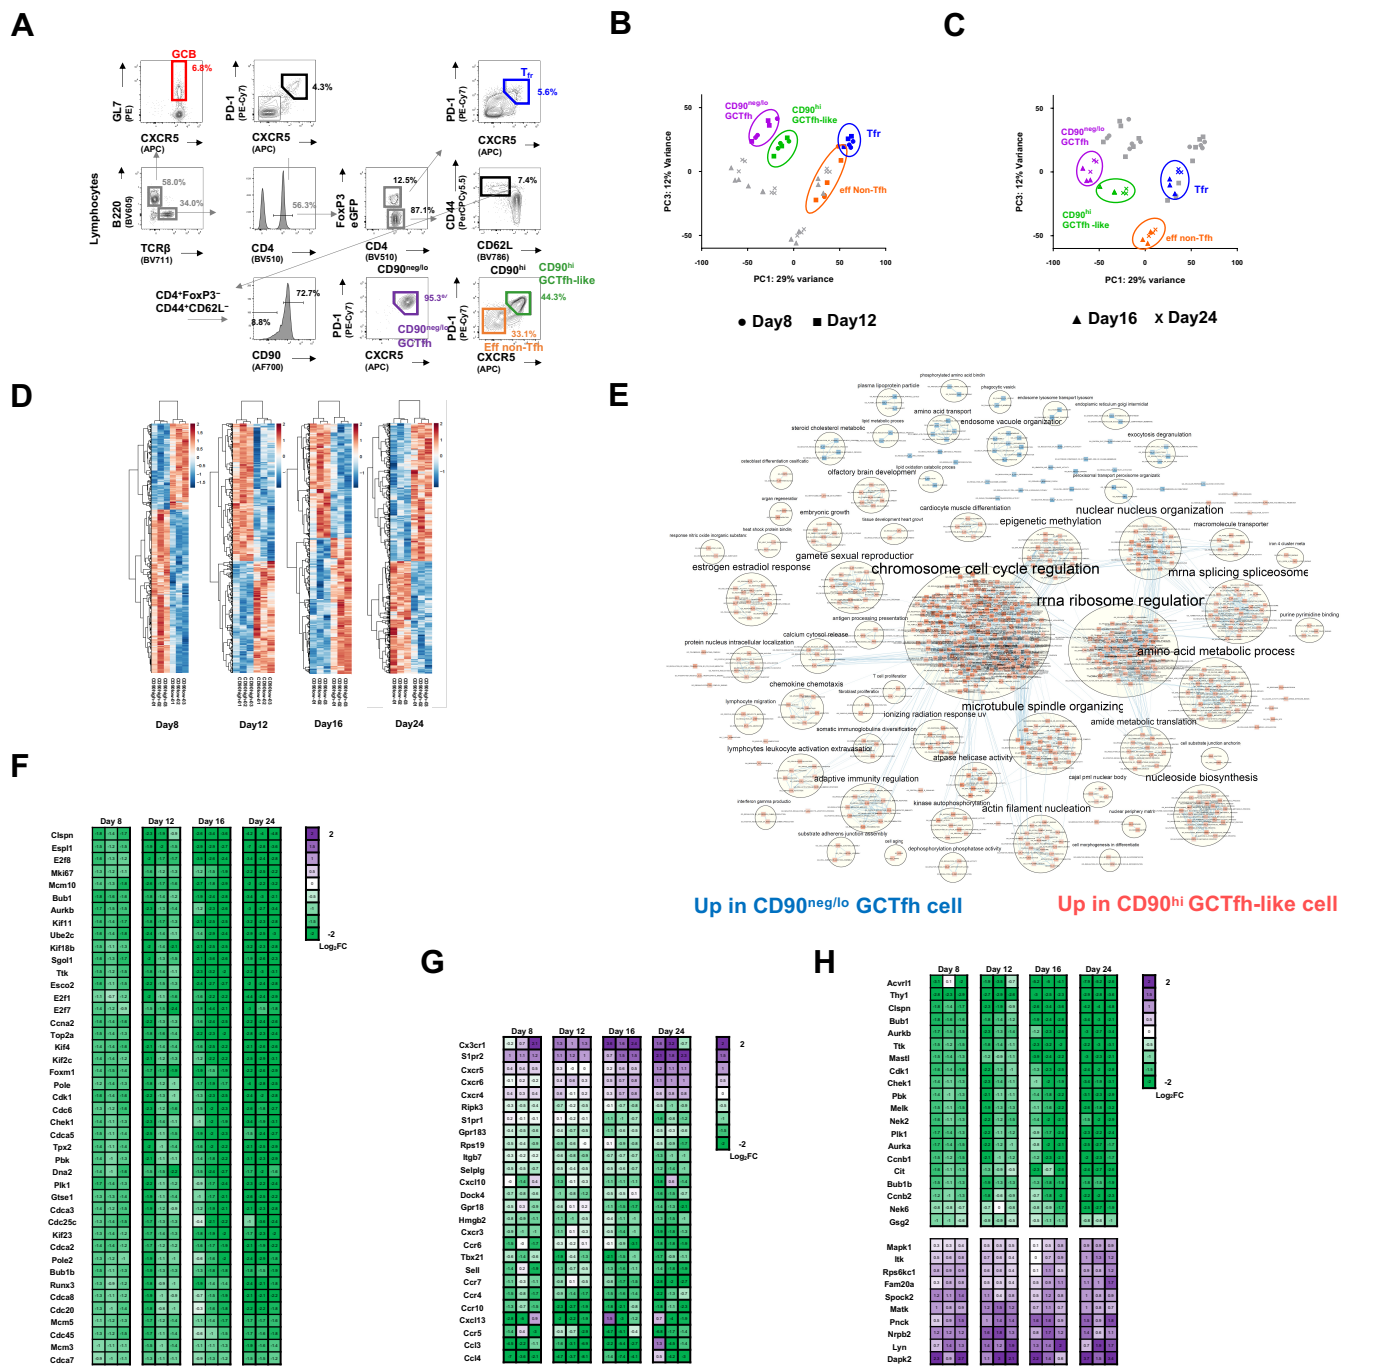

**Supplementary Figure 7. CD90<sup>neg/lo</sup> GCTfh and CD90<sup>hi</sup> GCTfh-like cells are phenotypically similar but functionally and physiologically divergent populations (related to Figure 7).** FoxP3<sup>EGFP</sup> mice were footpad-immunized with 20  $\mu$ g of NP-OVA in alum and harvested at days 8, 12, 16 and 24 p.i. CD90<sup>neg/lo</sup> GCTfh (purple) and CD90<sup>hi</sup> GCTfh-like (green) cells were sorted from the same pLN and subjected to ultra-low RNA sequencing. **(A)** CD90<sup>low</sup>GCTfh (purple), CD90<sup>hi</sup>GCTfh-like (green), eff Non-Tfh (orange) and Tfr (light blue) cells were sorted as B220-TCR $\beta$ +CD44+CD62L-FoxP3-CD90<sup>neg/lo</sup>GCTfh (purple), B220-TCR $\beta$ +CD44+CD62L-FoxP3-CD90<sup>hi</sup>CXCR5<sup>hi</sup>PD-1<sup>hi</sup>, B220-TCR $\beta$ +CD44+CD62L-FoxP3-CD90<sup>hi</sup>CXCR5<sup>hi</sup>PD-1<sup>hi</sup>, B220-TCR $\beta$ +CD44+CD62L-FoxP3-CD90<sup>hi</sup>CXCR5<sup>low</sup>PD-1<sup>low</sup> and B220-TCR $\beta$ +CD44+CD62L-FoxP3+CXCR5<sup>hi</sup>PD-1<sup>hi</sup> populations, respectively. **(B)** Principal components analysis of day 8 and day 12 samples. **(C)** Principal components analysis of day 16 and day 24 samples. **(D)** Heatmap graph representing differentially expressed genes in GCTfh and Tfh-like cells at indicated time points ( $P < 0.05$  &  $\geq 2$ -fold-change for each comparison). Gene expression was z-score normalized and the samples and genes were clustered by correlation distance with complete linkage. **(E)** Gene set enrichment analysis was performed to identify gene ontology terms with altered gene expression for each of the comparisons performed. Significant gene sets with  $FDR < 0.1$  or  $P < 0.01$  were visualized with Cytoscape and Enrichment Map. GSEA Enrichment results were mapped as a network of gene sets (nodes) related by mutual overlap (edges), where the color intensity represents significance and color hue represents the class of interest (that is, enriched in CD90<sup>neg/lo</sup> GCTfh, blue; enriched in CD90<sup>hi</sup>GCTfh-like, red). Groups of gene set comparison nodes with overlapped gene list (Overlap coefficient  $> 0.375$ ) are circled and labeled with AutoAnnotate 1.3 using clusterMaker 2. **(F-H)** Heatmap graph showing the fold-change of **(F)** cell division- and proliferation-, **(G)** chemotaxis- and cell migration- and **(H)** protein kinase phosphorylation-related gene expression in CD90<sup>neg/lo</sup> GCTfh over CD90<sup>hi</sup>GCTfh-like cells in each individual pLN. Numbers indicate the value of log<sub>2</sub> fold-change in gene expression in each sample ( $n = 3$  at each time point).
